# Supplementary material
Source: PubMed Central journal article supplement (PMC8210949)
Supplement: NIHMS1710097-supplement-FigureS1.pdf [file NIHMS1710097-supplement-FigureS1.pdf]

## **SUPPORTING INFORMATION**

### **Temporal proteomic profiling of SH-SY5Y differentiation with retinoic acid using FAIMS and Real-Time Searching**

**Tian Zhang <sup>1</sup>, Steven P. Gygi <sup>1</sup> and Joao A. Paulo <sup>1,\*</sup>**

<sup>1</sup> Department of Cell Biology, Harvard Medical School, Boston, MA 02115, United States

\*Corresponding author:

**Supplemental Figure 1: Protein differences in the time course dataset.**

**Supplemental Table 1: Proteins quantified in the end-point TMT6 dataset.**

**Supplemental Table 2: Proteins quantified in the time course TMTpro16 dataset.**

**Supplemental Table 3: Peptides quantified in end-point TMT6-plex dataset.**

**Supplemental Table 4: Peptides quantified in the time course TMT16pro dataset.**

**Supplemental Table 5: Expanded gene ontology classifications for differentially abundant proteins.**

**Supplemental Table 6: Expanded KEGG pathway classifications for differentially abundant proteins.**

**Supplemental Figure 1:**

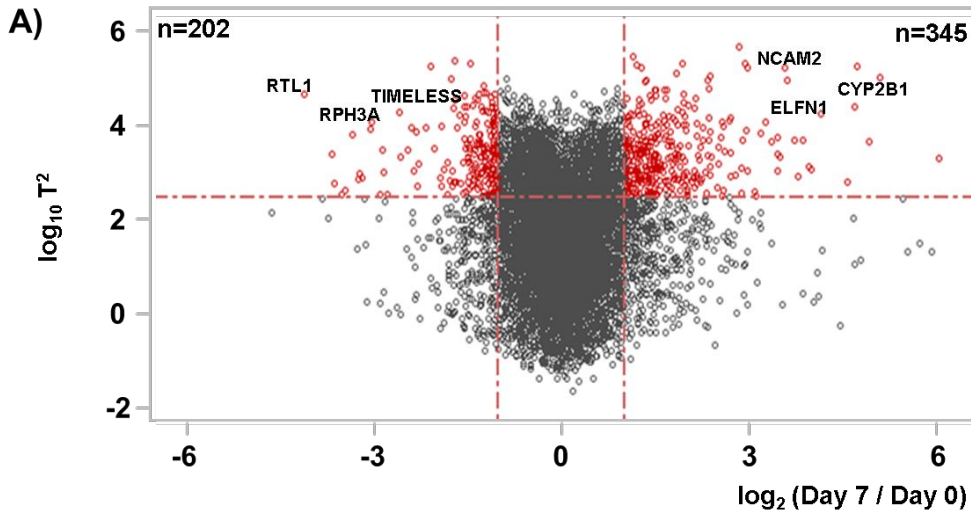

**B) Proteins with increased abundance**

| Category | Term                              | Count | %     | FDR      |
|----------|-----------------------------------|-------|-------|----------|
| BP       | cell adhesion                     | 30    | 8.82  | 4.43E-05 |
| BP       | cell migration                    | 17    | 5.00  | 4.29E-04 |
| BP       | extracellular matrix organization | 20    | 5.88  | 1.61E-05 |
| CC       | actin cytoskeleton                | 17    | 5.00  | 4.32E-03 |
| CC       | cell surface                      | 38    | 11.18 | 1.05E-08 |
| CC       | cell-cell junction                | 16    | 4.71  | 1.02E-03 |
| CC       | extracellular exosome             | 158   | 46.47 | 2.02E-39 |
| CC       | extracellular matrix              | 21    | 6.18  | 9.48E-04 |
| CC       | extracellular space               | 52    | 15.29 | 1.02E-03 |
| CC       | focal adhesion                    | 47    | 13.82 | 7.99E-21 |
| CC       | membrane raft                     | 19    | 5.59  | 7.70E-05 |
| CC       | plasma membrane                   | 131   | 38.53 | 2.89E-08 |

**C) Proteins with decreased abundance**

| Category | Term                                 | Count | %     | FDR      |
|----------|--------------------------------------|-------|-------|----------|
| BP       | cell division                        | 27    | 13.64 | 8.15E-12 |
| BP       | DNA repair                           | 13    | 6.57  | 1.24E-02 |
| BP       | DNA replication                      | 26    | 13.13 | 1.68E-19 |
| BP       | DNA replication initiation           | 12    | 6.06  | 2.31E-11 |
| BP       | mitotic nuclear division             | 20    | 10.10 | 2.80E-08 |
| CC       | cytoplasm                            | 95    | 47.98 | 5.94E-07 |
| CC       | nuclear chromosome, telomeric region | 10    | 5.05  | 1.04E-02 |
| CC       | nucleus                              | 111   | 56.06 | 1.44E-13 |
| MF       | chromatin binding                    | 17    | 8.59  | 7.07E-03 |
| MF       | structural molecule activity         | 13    | 6.57  | 2.06E-02 |

**Supplemental Figure 1: Protein differences in the time course dataset.** **A)** Volcano plot illustrating the  $\log_{10} T^2$ -statistic plotted against the  $\log_2$  values of the fold changes of Day 7/Day 0. Highlighted on the volcano plot are six of the most altered proteins resulting from retinoic acid treatment. These are the same proteins that are highlighted in **Figure 2** and **Figure 3**. Gene ontology classifications for **B)** up-regulated ( $n=345$ ) and **C)** down-regulated ( $n=202$ ) differentially abundant proteins as determined from the  $T^2$ -statistic and fold change in panel **A**).
